# Supplementary material for: A multimodal dataset for authoring and editing multimedia content: The MAMEM project
Source: PubMed Central journal article supplement (PMC5709300; doi:10.1016/j.dib.2017.10.072), 2017-11-03
Supplement: mmc2.pdf [file mmc2.pdf]

# Supplementary Material

## Heavyweight and Lightweight Channel List

The heavyweight configuration of the EEG system consists of the BePlusLTM Bioelectric Signal Amplifier (64 channels) and an EEG prewired headcap in elastic fabric. The headcap has 61+2 electrodes placed according to the 10-20 system. The electrodes with even numbers are placed on the left hemisphere, whereas the odd ones on the right. A complete list with all electrodes and the corresponding labels of the amplifier are provided on Table A1.

**Table 1** Heavyweight channel indexes and electrode names

|     |    |     |    |     |    |         |    |
|-----|----|-----|----|-----|----|---------|----|
| AF7 | 1  | FC3 | 17 | CP3 | 33 | PO3     | 49 |
| AF3 | 2  | FC1 | 18 | CP1 | 34 | O1      | 50 |
| FP1 | 3  | FC2 | 19 | CP2 | 35 | O2      | 51 |
| FP2 | 4  | FC4 | 20 | CP4 | 36 | PO4     | 52 |
| AF4 | 5  | FC6 | 21 | CP6 | 37 | PO8     | 53 |
| AF8 | 6  | FT8 | 22 | TP8 | 38 | OZ      | 54 |
| F7  | 7  | T3  | 23 | T5  | 39 | AFZ     | 55 |
| F5  | 8  | C5  | 24 | P5  | 40 | FZ      | 56 |
| F3  | 9  | C3  | 25 | P3  | 41 | FCZ     | 57 |
| F1  | 10 | C1  | 26 | P1  | 42 | CZ      | 58 |
| F2  | 11 | C2  | 27 | P2  | 43 | CPZ     | 59 |
| F4  | 12 | C4  | 28 | P4  | 44 | PZ      | 60 |
| F6  | 13 | C6  | 29 | P6  | 45 | POZ     | 61 |
| F8  | 14 | T4  | 30 | T6  | 46 | SERVICE | 62 |
| FT7 | 15 | TP7 | 31 | FPZ | 47 |         |    |
| FC5 | 16 | CP5 | 32 | PO7 | 48 |         |    |

The lightweight configuration of the EEG system consists of a wireless headcap, connected via bluetooth, with 14+2(reference) electrodes placed according to the ICNS 10-20 system. The electrode numbers correspond the left and right hemisphere the way they do in the heavyweight configuration.

**Table 2** Lightweight Channel list

|     |   |
|-----|---|
| AF3 | 1 |
| F7  | 2 |

|     |    |
|-----|----|
| F3  | 3  |
| FC5 | 4  |
| T7  | 5  |
| P7  | 6  |
| O1  | 7  |
| O2  | 8  |
| P8  | 9  |
| T8  | 10 |
| FC6 | 11 |
| F4  | 12 |
| F8  | 13 |
| AF4 | 14 |

## Event List

The complete list of the event markers that have been recorded during our experiments can be found in Table 3 below. These events can be used for marking and segmenting the EEG, eye-tracking, GSR or HR signals. In the first section named “GazeTheWeb - Training & Dictated Tasks”, the events that are common for these two tasks are described. Different sections of the table present the events that are unique for the tasks of GazeTheWeb - Training, ErrP experiment and SMR experiment.

**Table 3** Events List

| Event key                              | Description                             |
|----------------------------------------|-----------------------------------------|
| GazeTheWeb - Training & Dictated Tasks |                                         |
| Click performed                        |                                         |
| Close Tab Overview                     |                                         |
| Close URL input                        |                                         |
| Close Tab Overview                     |                                         |
| Display bookmarks                      |                                         |
| Edit URL                               |                                         |
| GAZE_SELECTED_KEY_[KEY]                | Specified which key was pressed         |
| Go back                                |                                         |
| Inputting Text: [TEXT]                 | User typed a text and hit the OK button |
| Loading URL: [URL]                     |                                         |
| Open Tab Overview                      |                                         |
| Open bookmark: [BOOKMARK]              |                                         |
| Open new tab                           |                                         |

|                                        |                                                          |
|----------------------------------------|----------------------------------------------------------|
| Submitting Text: [TEXT]                | User typed a text and hit the submit button              |
| Text input started                     |                                                          |
| URL input done                         |                                                          |
| GazeTheWeb - Training                  |                                                          |
| page_load__overview                    | Overview page loaded.                                    |
| page_load__level_intro                 | Level intro loaded.                                      |
| page_load__level_intro_countdown_start | The countdown to start the level has begun.              |
| page_load__level_basic_1_start         | BASIC-1 has started.                                     |
| page_load__level_basic_2_start         | BASIC-2 has started.                                     |
| page_load__level_int_1_start           | INT-1 has started.                                       |
| page_load__level_int_2_start           | INT-2 has started.                                       |
| page_load__level_int_3_start           | INT-3 has started.                                       |
| page_load__level_adv_1_start           | ADV-1 has started.                                       |
| page_load__level_adv_2_start           | ADV-2 has started.                                       |
| page_load__level_adv_3_start           | ADV-3 has started.                                       |
| page_load__level_adv_4_start           | ADV-4 has started.                                       |
| page_load__level_results               | Open results page.                                       |
| page_load__level_failed_text           | Openg page that tells user to replay the level.          |
| page_load__level_replay                | Initiated level load for replaying.                      |
| page_load__next_level                  | Initiated action to go to next level.                    |
| level_basic_1__new_marker              | New marker added to BASIC-1                              |
| level_basic_1__new_markers_batch       | Based on evaluation, another batch of markers was added. |
| level_basic_2__mole_start              | Mole appeared.                                           |
| level_basic_2__mole_end                | Mole dissapeared. Time's up.                             |
| level_basic_2__moles_new_batch         | Add new batch of moles based on eval.                    |
| level_basic_2__mole_hit                | Mole HIT.                                                |
| level_int_1__tower_instance            | Got inside the tower.                                    |
| level_int_1__cave_instance             | Got inside the cave.                                     |
| level_int_2__question_asked_easy       | Loaded easy question.                                    |
| level_int_2__question_asked_med        | Loaded medium question.                                  |
| level_int_2__question_asked_hard       | Loaded hard question.                                    |
| level_int_2__answer_correct            | Answered correctly.                                      |

|                                |                                                          |
|--------------------------------|----------------------------------------------------------|
| level_int_2__answer_wrong      | Didn't answer correct.                                   |
| level_int_3__map_on            | Clicked on globe to show the map.                        |
| level_int_3__coords_submit     | Coordinates submitted.                                   |
| level_int_3__coords_correct    | Coordinates submitted are correct.                       |
| level_int_3__coords_wrong      | Coordinates submitted are wrong.                         |
| level_adv_1__msg_settings      | Opened GTW Settings View.                                |
| level_adv_1__msg_general       | Opened GTW General Settings View.                        |
| level_adv_1__msg_gaze_on       | Activated Gaze mode.                                     |
| level_adv_1__msg_gaze_off      | Deactivated Gaze mode.                                   |
| level_adv_1__msg_close         | Closed any instance of GTW Interface.                    |
| level_adv_2__msg_tabs          | Opened GTW Tabs View.                                    |
| level_adv_2__msg_edit          | Started editing a URL.                                   |
| level_adv_2__msg_keystroke     | Keys are pressed on the GTW Keyboard.                    |
| level_adv_2__msg_close         | Closed any instance of GTW Interface.                    |
| level_adv_3__msg_close         | Closed any instance of GTW Interface.                    |
| level_adv_4__msg_tabs          | Opened GTW Tabs View.                                    |
| level_adv_4__msg_bookmark_add  | Added current page as Bookmark.                          |
| level_adv_4__msg_new_tab       | Added new GTW Tab.                                       |
| level_adv_4__msg_bookmarks     | Accessed the Bookmarks View of GTW.                      |
| level_adv_4__msg_open_bookmark | Loaded the saved bookmark.                               |
| level_adv_4__msg_tabs_again    | Returned to GTW Tabs View.                               |
| level_adv_4__msg_tab0          | Returned to First tab of GTW.                            |
| trophy                         | Got a trophy.                                            |
| level_complete                 | The level is complete.                                   |
| level_failed                   | The level has failed.                                    |
| event__mouse_over              | The cursor is on top of an element.                      |
| event__mouse_out               | The cursor is now out of bounds of the previous element. |
| event__mouse_down              | The hand cursor action (left click) has been fired.      |
| event__browser_back            | The BACK button of the browser has been pressed.         |
| event__copy                    | Pasted text.                                             |
| SMR Experiment                 |                                                          |
| 101                            | Start of 1st session (real hand movement)                |

|                  |                                                                |
|------------------|----------------------------------------------------------------|
| 102              | Start of 2nd session (real movement with feedback)             |
| 103              | Start of 3rd session (imaginary hand movement 1)               |
| 104              | Start of 4th session (imaginary hand movement 2)               |
| 105              | Start of 5th session (imaginary hand movement with feedback 1) |
| 106              | Start of 6th session (imaginary hand movement with feedback 2) |
| 107              | Start of 7th session (imaginary hand movement with feedback 3) |
| 108              | Start of 8th session (imaginary hand movement with feedback 4) |
| 201              | End of 1st session (real hand movement)                        |
| 202              | End of 2nd session (real movement with feedback)               |
| 203              | End of 3rd session (imaginary hand movement 1)                 |
| 204              | End of 4th session (imaginary hand movement 2)                 |
| 205              | End of 5th session (imaginary hand movement with feedback 1)   |
| 206              | End of 6th session (imaginary hand movement with feedback 2)   |
| 207              | End of 7th session (imaginary hand movement with feedback 3)   |
| 208              | End of 8th session (imaginary hand movement with feedback 4)   |
| 768              | Start of Trial                                                 |
| 769              | Left Arrow presented on the screen                             |
| 770              | Right Arrow presented on the screen                            |
| 781              | Feedback appeared on the screen                                |
| 786              | Cross appeared on the screen                                   |
| 800              | End of Trial                                                   |
| 32775            | Baseline signal started                                        |
| 32776            | Baseline signal stopped                                        |
| ERRP Experiment  |                                                                |
| Begin_Rest_1     | Start of baseline signal recording 1                           |
| Begin_Sentence_1 | Begin typing sentence 1                                        |
| Begin_Sentence_2 | Begin typing sentence 2                                        |
| Begin_Sentence_3 | Begin typing sentence 3                                        |

|                                       |                                               |
|---------------------------------------|-----------------------------------------------|
| Begin_Sentence_4                      | Begin typing sentence 4                       |
| Begin_Sentence_5                      | Begin typing sentence 5                       |
| Begin_Rest_2                          | Start of baseline signal recording 2          |
| End_Rest_1                            | End of baseline signal recording 1            |
| End_Sentence_1                        | End typing sentence 1                         |
| End_Sentence_2                        | End typing sentence 2                         |
| End_Sentence_3                        | End typing sentence 3                         |
| End_Sentence_4                        | End typing sentence 4                         |
| End_Sentence_5                        | End typing sentence 5                         |
| End_Rest_2                            | End of baseline signal recording 2            |
| GAZE_SELECTED_KEY_[KEY]               | Specifies which key was typed by the user     |
| Key-Selection-Duration to 0.5 seconds | Key dwell time set to 0.5 seconds (fast mode) |
| Key-Selection-Duration to 1.0 seconds | Key dwell time set to 1.0 seconds (slow mode) |
| -1                                    | Typed the wrong character                     |
| 1                                     | Typed the correct character                   |
